# Supplementary material
Source: publisher figshare collection journal article supplement (https://acs.figshare.com/ndownloader/files/34780638)
Supplement: Supplementary file 1 [file 34780638]

**Supporting information for:**  
**Small-Molecular Adjuvants with Weak Membrane Perturbation Potentiate Antibiotics  
against Gram-Negative Superbugs**

Geetika Dhanda<sup>[a]</sup>, Riya Mukherjee<sup>[a]</sup>, Debajyoti Basak<sup>[a]</sup> and Jayanta Halder<sup>[a], [b]</sup>

<sup>[a]</sup>Antimicrobial Research Laboratory, New Chemistry Unit, Jawaharlal Nehru Centre for Advanced Scientific Research (JNCASR), Jakkur, Bengaluru 560064, Karnataka, India

<sup>[b]</sup>School of Advanced Materials, Jawaharlal Nehru Centre for Advanced Scientific Research (JNCASR), Jakkur, Bengaluru 560064, Karnataka, India

E-mail: jayanta@jncasr.ac.in

**Table of Contents**

|                             |     |
|-----------------------------|-----|
| 1. Characterization details | S2  |
| 2. <i>In vitro</i> assays   | S14 |
| 3. Results                  | S16 |

## Characterization details

***N*<sup>1</sup>-Boc-*N*<sup>3</sup>-(3-(Boc-amino) propyl) propane-1,3-diamine (1a):** Yield-50%, <sup>1</sup>H-NMR (400 MHz, CDCl<sub>3</sub>) δ/ppm: 5.178 (s, -*NHBoc*, 2H), 3.205-3.098 (m, NH(-CH<sub>2</sub>-(CH<sub>2</sub>)<sub>2</sub>-NHBoc)<sub>2</sub>, 4H), 2.658-2.625 (m, NH(-(CH<sub>2</sub>)<sub>2</sub>-CH<sub>2</sub>-NHBoc)<sub>2</sub>, 4H), 1.672-1.607 (m, NH(-CH<sub>2</sub>-CH<sub>2</sub>-CH<sub>2</sub>-NHBoc)<sub>2</sub>, 4H), 1.443 (s, NH(-(CH<sub>2</sub>)<sub>3</sub>-NH-COO-C(CH<sub>3</sub>)<sub>3</sub>)<sub>2</sub>, 18H). Formula: C<sub>16</sub>H<sub>33</sub>N<sub>3</sub>O<sub>4</sub>, HRMS (m/z): 332.2539 [(M+H)<sup>+</sup>] (Observed), 332.2549 [(M+H)<sup>+</sup>] (Calculated).

***N,N*-bis(3-(Boc-amino)propyl) decanamide (1b):** Yield-78%; <sup>1</sup>H-NMR (400 MHz, CDCl<sub>3</sub>) δ/ppm: 5.388 (s, -*NHBoc*, 1H), 4.707 (s, -*NHBoc*, 1H), 3.386-3.000 (m, R-CO-N(-CH<sub>2</sub>-CH<sub>2</sub>-CH<sub>2</sub>-NHBoc)<sub>2</sub>, 8H), 2.267 (t, *J* = 7.6 Hz, CH<sub>3</sub>-(CH<sub>2</sub>)<sub>7</sub>-CH<sub>2</sub>- of R group, 2H), 1.777-1.611 (m, CH<sub>3</sub>-(CH<sub>2</sub>)<sub>6</sub>-CH<sub>2</sub>-CH<sub>2</sub>- of R group, 6H), 1.407 (s, R-CO-N(-(CH<sub>2</sub>)<sub>3</sub>-NH-COO-C(CH<sub>3</sub>)<sub>3</sub>)<sub>2</sub>, 18H), 1.241 (bs, CH<sub>3</sub>-(CH<sub>2</sub>)<sub>6</sub>-CH<sub>2</sub>-CH<sub>2</sub>- of R group, 12H), 0.854 (t, *J* = 7.08 Hz, CH<sub>3</sub>-(CH<sub>2</sub>)<sub>7</sub>-CH<sub>2</sub>- of R group, 3H). Formula: C<sub>26</sub>H<sub>51</sub>N<sub>3</sub>O<sub>5</sub>, HRMS (m/z): 486.3899 [(M+H)<sup>+</sup>] (Observed), 486.3907 [(M+H)<sup>+</sup>] (Calculated).

***N,N*-bis(3-(Boc-amino)propyl) dodecanamide (1c):** Yield-90%; <sup>1</sup>H-NMR (400 MHz, CDCl<sub>3</sub>) δ/ppm: 5.377 (s, -*NHBoc*, 1H), 4.654 (s, -*NHBoc*, 1H), 3.393-3.006 (m, R-CO-N(-CH<sub>2</sub>-CH<sub>2</sub>-CH<sub>2</sub>-NHBoc)<sub>2</sub>, 8H), 2.271 (t, *J* = 7.44 Hz, CH<sub>3</sub>-(CH<sub>2</sub>)<sub>9</sub>-CH<sub>2</sub>- of R group, 2H), 1.783-1.570 (m, CH<sub>3</sub>-(CH<sub>2</sub>)<sub>8</sub>-CH<sub>2</sub>-CH<sub>2</sub>- of R group, 6H), 1.422 (s, R-CO-N(-(CH<sub>2</sub>)<sub>3</sub>-NH-COO-C(CH<sub>3</sub>)<sub>3</sub>)<sub>2</sub>, 18H), 1.242 (bs, CH<sub>3</sub>-(CH<sub>2</sub>)<sub>8</sub>-CH<sub>2</sub>-CH<sub>2</sub>- of R group, 16H), 0.863 (t, *J* = 7.2 Hz, CH<sub>3</sub>-(CH<sub>2</sub>)<sub>9</sub>-CH<sub>2</sub>- of R group, 3H). Formula: C<sub>28</sub>H<sub>55</sub>N<sub>3</sub>O<sub>5</sub>, HRMS (m/z): 514.4208 [(M+H)<sup>+</sup>] (Observed), 514.4220 [(M+H)<sup>+</sup>] (Calculated).

***N,N*-bis(3-(Boc-amino)propyl) naphthyl ethanamide (1d):** Yield-55%; <sup>1</sup>H-NMR (400 MHz, CDCl<sub>3</sub>) δ/ppm: 7.936-7.771 (m, *H*<sub>Ar</sub>, 3H), 7.553-7.331 (m, *H*<sub>Ar</sub>, 4H), 5.268 (s, -*NHBoc*, 1H), 4.484 (s, -*NHBoc*, 1H), 4.133 (s, ArCH<sub>2</sub>- of R group, 2H), 3.461-3.037 (m, R-CO-N(-CH<sub>2</sub>-CH<sub>2</sub>-CH<sub>2</sub>-NHBoc)<sub>2</sub>, 8H), 1.709-1.679 (m, R-CO-N((-CH<sub>2</sub>-CH<sub>2</sub>-CH<sub>2</sub>-NHBoc)<sub>2</sub>, 4H), 1.4075 (s, R-CO-N(-(CH<sub>2</sub>)<sub>3</sub>-NH-COO-C(CH<sub>3</sub>)<sub>3</sub>)<sub>2</sub>, 18H). Formula: C<sub>28</sub>H<sub>41</sub>N<sub>3</sub>O<sub>5</sub>, HRMS (m/z): 522.2935 [(M+Na)<sup>+</sup>] (Observed), 522.2944 [(M+Na)<sup>+</sup>] (Calculated).

***N,N*-bis(3-(Boc-amino)propyl) 3,3-diphenyl propanamide (1e):** Yield-74%; <sup>1</sup>H-NMR (400 MHz, CDCl<sub>3</sub>) δ/ppm: 7.288-7.284 (*H*<sub>Ar</sub>, 3H), 7.252-7.154 (m, *H*<sub>Ar</sub>, 7H), 5.227 (s, -*NHBoc*, 1H), 4.714 (t, *J* = 7.6 Hz, ArCHCH<sub>2</sub>- of R group, 1H), 4.560 (s, -*NHBoc*, 1H), 3.337-3.055 and 2.783-2.739 (m, R-CO-N(-CH<sub>2</sub>-CH<sub>2</sub>-CH<sub>2</sub>-NHBoc)<sub>2</sub>, 8H), 3.026 (d, *J* = 7.6 Hz, ArCHCH<sub>2</sub>- of R group, 2H), 1.636-1.439 (m, R-CO-N(-CH<sub>2</sub>-CH<sub>2</sub>-CH<sub>2</sub>-NHBoc)<sub>2</sub>, 4H), 1.434

(s, R-CO-N(-(CH<sub>2</sub>)<sub>3</sub>-NH-COO-C(CH<sub>3</sub>)<sub>3</sub>)<sub>2</sub>, 18H). Formula: C<sub>31</sub>H<sub>45</sub>N<sub>3</sub>O<sub>5</sub>, HRMS (m/z): 540.3400 [(M+H)<sup>+</sup>] (Observed), 540.3437 [(M+H)<sup>+</sup>] (Calculated).

**N-(Adamantan-2-yl)-2-bromoethanamide (1f):** <sup>1</sup>H-NMR (400 MHz, CDCl<sub>3</sub>) δ/ppm: 6.914 (s, Ad-NH-CO-CH<sub>2</sub>Br, 1H), 4.046-4.025 (m, H<sub>Ad</sub>, 1H), 3.912 (s, Ad-NH-CO-CH<sub>2</sub>Br, 2H), 1.944-1.612 (m, H<sub>Ad</sub>, 14H). Formula: C<sub>12</sub>H<sub>18</sub>BrNO, HRMS (m/z): 272.0575 [(M+H)<sup>+</sup>] (Observed), 272.0650 [(M+H)<sup>+</sup>] (Calculated).

**N-(Adamantan-2-yl)-2-[N',N'-{bis-(3-Boc-amino) propyl} amino] ethanamide (1g):** <sup>1</sup>H-NMR (400 MHz, CDCl<sub>3</sub>) δ/ppm: 4.747 (br, -NH-Boc, 2H), 4.126-4.040 (m, H<sub>Ad</sub>, 1H), 3.178-3.087 (br, Ad-NH-CO-CH<sub>2</sub>-N(-(CH<sub>2</sub>)<sub>2</sub>-CH<sub>2</sub>-NHBoc)<sub>2</sub>, 6H), 2.560 (br, Ad-NH-CO-CH<sub>2</sub>-N(CH<sub>2</sub>-(CH<sub>2</sub>)<sub>2</sub>-NHBoc)<sub>2</sub>, 4H), 1.903-1.664 (br, H<sub>Ad</sub> and Ad-NH-CO-CH<sub>2</sub>-N(CH<sub>2</sub>-CH<sub>2</sub>-CH<sub>2</sub>-NHBoc)<sub>2</sub>, 17H), 1.432 (s, Ad-NH-CO-CH<sub>2</sub>-N(-(CH<sub>2</sub>)<sub>3</sub>-NH-COO-C(CH<sub>3</sub>)<sub>3</sub>)<sub>2</sub>, 18H). Formula: C<sub>28</sub>H<sub>50</sub>N<sub>4</sub>O<sub>5</sub>, HRMS (m/z): 523.3971 [(M+H)<sup>+</sup>] (Observed), 523.3859 [(M+H)<sup>+</sup>] (Calculated).

**N,N-bis((3-amino)propyl)decanamide bis(trifluoroacetate) (NC10):** Yield-Quantitative. <sup>1</sup>H-NMR (400 MHz, DMSO-d<sub>6</sub>) δ/ppm: 8.589-7.886 (br, R-CO-N(-(CH<sub>2</sub>)<sub>3</sub>-NH<sub>3</sub><sup>+</sup>)<sub>2</sub>, 6H), 3.131-2.868 (m, R-CO-N(-CH<sub>2</sub>-CH<sub>2</sub>-CH<sub>2</sub>-NH<sub>3</sub><sup>+</sup>)<sub>2</sub>, 8H), 2.061 (t, *J* = 7.6 Hz, CH<sub>3</sub>-(CH<sub>2</sub>)<sub>7</sub>-CH<sub>2</sub>- of R group, 2H), 1.910-1.464 (m, CH<sub>3</sub>-(CH<sub>2</sub>)<sub>6</sub>-CH<sub>2</sub>-CH<sub>2</sub>- of R group, 6H), 1.239 (bs, CH<sub>3</sub>-(CH<sub>2</sub>)<sub>6</sub>-CH<sub>2</sub>-CH<sub>2</sub>- of R group, 12H), 0.857 (t, *J* = 7.2 Hz, CH<sub>3</sub>-(CH<sub>2</sub>)<sub>7</sub>-CH<sub>2</sub>- of R group, 3H). <sup>13</sup>C-NMR (100 MHz, DMSO-d<sub>6</sub>): 172.7 (R-CO-N(-CH<sub>2</sub>-CH<sub>2</sub>-CH<sub>2</sub>-NH<sub>3</sub><sup>+</sup>)<sub>2</sub>, 1C), 44.8, (R-CO-N(-CH<sub>2</sub>-CH<sub>2</sub>-CH<sub>2</sub>-NH<sub>3</sub><sup>+</sup>)<sub>2</sub>, 2C), 44.0 (R-CO-N(-CH<sub>2</sub>-CH<sub>2</sub>-CH<sub>2</sub>-NH<sub>3</sub><sup>+</sup>)<sub>2</sub>, 2C), 39.5 ((CD<sub>3</sub>)<sub>2</sub>SO), 36.2, 35.5, 35.3, 31.2, 28.9, 28.8, 28.7, 28.6, 26.1, 25.2, 23.8, 22.1, 13.9 (36.2-13.9 signifies aliphatic region). FT-IR (cm<sup>-1</sup>): 3254 (N-H str. of 1° amine), 3080 (N-H str. of 1° amine), 2909 (sp<sup>3</sup> C-H str.), 2849 (sp<sup>3</sup> C-H str.), 1674 (C=O str. of 3° amide). Formula: C<sub>16</sub>H<sub>35</sub>N<sub>3</sub>O, HRMS (m/z): 286.2850 [(M+H)<sup>+</sup>] (Observed), 286.2858 [(M+H)<sup>+</sup>] (Calculated).

**N,N-bis((3-amino)propyl)dodecanamide bis(trifluoroacetate) (NC12):** Yield-Quantitative, HPLC Purity- 97%. <sup>1</sup>H-NMR (400 MHz, DMSO-d<sub>6</sub>) δ/ppm: 7.894 (bs, R-CO-N(-(CH<sub>2</sub>)<sub>3</sub>-NH<sub>3</sub><sup>+</sup>)<sub>2</sub>, 6H), 3.300-3.265 (m, R-CO-N(-(CH<sub>2</sub>)<sub>2</sub>-CH<sub>2</sub>-NH<sub>3</sub><sup>+</sup>)<sub>2</sub>, 4H), 2.864-2.696 (m, R-CO-N(-CH<sub>2</sub>-(CH<sub>2</sub>)<sub>2</sub>-NH<sub>3</sub><sup>+</sup>)<sub>2</sub>, 4H), 2.276 (t, *J* = 7.2 Hz, CH<sub>3</sub>-(CH<sub>2</sub>)<sub>9</sub>-CH<sub>2</sub>- of R group, 2H), 1.850-1.481 (m, CH<sub>3</sub>-(CH<sub>2</sub>)<sub>8</sub>-CH<sub>2</sub>-CH<sub>2</sub>- of R group, 6H), 1.237 (s, CH<sub>3</sub>-(CH<sub>2</sub>)<sub>8</sub>-CH<sub>2</sub>-CH<sub>2</sub>- of R group, 16H), 0.850 (t, *J* = 6.8 Hz, CH<sub>3</sub>-(CH<sub>2</sub>)<sub>8</sub>-CH<sub>2</sub>-CH<sub>2</sub>- of R group, 3H). <sup>13</sup>C-NMR (100 MHz, DMSO-d<sub>6</sub>): 172.7 (R-CO-N(-CH<sub>2</sub>-(CH<sub>2</sub>)<sub>2</sub>-NH<sub>3</sub><sup>+</sup>)<sub>2</sub>, 1C), 44.8, 44.3, 44.0, 41.8, 39.5

((CD<sub>3</sub>)<sub>2</sub>SO), 36.6, 36.4, 36.2, 35.5, 35.3, 31.9, 31.3, 29.0, 29.0, 28.8, 28.7, 26.6, 26.1, 25.6, 25.2, 25.0, 23.8, 22.1, 13.9 (44.8-13.9 signifies aliphatic region). FT-IR (cm<sup>-1</sup>): 3458 (N-H str. of 1° amine), 3084 (N-H str. of 1° amine), 2928 (sp<sup>3</sup> C-H str.), 2852 (sp<sup>3</sup> C-H str.), 1677 (C=O str. of 3° amide). Formula: C<sub>18</sub>H<sub>39</sub>N<sub>3</sub>O, HRMS (m/z): 314.3172 [(M+H)<sup>+</sup>] (Observed), 314.3171 [(M+H)<sup>+</sup>] (Calculated).

**N,N-bis((3-amino)propyl)naphthyl ethanamide bis(trifluoroacetate) (NNaph):** Yield- Quantitative, HPLC Purity- 99%. <sup>1</sup>H-NMR (400 MHz, DMSO-d<sub>6</sub>) δ/ppm: 7.913-7.824 (m, R-CO-N(-(CH<sub>2</sub>)<sub>3</sub>-NH<sub>3</sub><sup>+</sup>)<sub>2</sub> and H<sub>Ar</sub>, 8H), 7.542-7.329 (m, H<sub>Ar</sub>, 5H), 4.176 (s, ArCH<sub>2</sub>- of R group, 2H), 3.556-3.339 (m, R-CO-N(-(CH<sub>2</sub>)<sub>2</sub>-CH<sub>2</sub>-NH<sub>3</sub><sup>+</sup>)<sub>2</sub>, 4H), 2.901-2.729 (m, R-CO-N-(CH<sub>2</sub>-(CH<sub>2</sub>)<sub>2</sub>-NH<sub>3</sub><sup>+</sup>)<sub>2</sub>, 4H), 1.987-1.767 (m, R-CO-N(-(CH<sub>2</sub>-CH<sub>2</sub>-CH<sub>2</sub>-NH<sub>3</sub><sup>+</sup>)<sub>2</sub>, 4H). <sup>13</sup>C-NMR (100 MHz, DMSO-d<sub>6</sub>): 170.9-170.6 (R-CO-N(-(CH<sub>2</sub>)<sub>2</sub>-CH<sub>2</sub>-NH<sub>3</sub><sup>+</sup>)<sub>2</sub>, 1C), 133.3-124.1 (C<sub>Ar</sub>, 7C), 44.8, 42.2, 39.5 ((CD<sub>3</sub>)<sub>2</sub>SO), 36.8, 36.7, 36.5, 26.7, 25.7, 23.8 (44.8-23.8 signifies aliphatic region). FT-IR (cm<sup>-1</sup>): 3013 (N-H str. of 1° amine), 1674 (C=O str. of 3° amide). Formula: C<sub>18</sub>H<sub>25</sub>N<sub>3</sub>O, HRMS (m/z): 300.2070 [(M+H)<sup>+</sup>] (Observed), 300.2076 [(M+H)<sup>+</sup>] (Calculated).

**N,N-bis((3-amino)propyl)3,3-diphenyl propanamide bis(trifluoroacetate) (NDiphe):** Yield- Quantitative, HPLC Purity- 96%. <sup>1</sup>H- NMR (400 MHz, DMSO-d<sub>6</sub>) δ/ppm: 7.845-7.648 (br, R-CO-N(-(CH<sub>2</sub>)<sub>3</sub>-NH<sub>3</sub><sup>+</sup>)<sub>2</sub>, 6H), 7.326-7.140 (m, H<sub>Ar</sub>, 10H), 4.536 (t, *J* = 7.6 Hz, ArCHCH<sub>2</sub>- of R group, 1H), 3.384-3.202 (m, R-CO-N(-(CH<sub>2</sub>)<sub>2</sub>-CH<sub>2</sub>-NH<sub>3</sub><sup>+</sup>)<sub>2</sub>, 4H), 3.109 (d, *J* = 7.6 Hz, ArCHCH<sub>2</sub>- of R group, 2H), 2.972-2.816 (m, R-CO-N-(CH<sub>2</sub>-(CH<sub>2</sub>)<sub>2</sub>-NH<sub>3</sub><sup>+</sup>)<sub>2</sub>, 4H), 1.808-1.578 (m, R-CO-N(-(CH<sub>2</sub>-CH<sub>2</sub>-CH<sub>2</sub>-NH<sub>3</sub><sup>+</sup>)<sub>2</sub>, 4H). <sup>13</sup>C-NMR (100 MHz, DMSO-d<sub>6</sub>): 170.8 (R-CO-N(-(CH<sub>2</sub>-(CH<sub>2</sub>)<sub>2</sub>-NH<sub>3</sub><sup>+</sup>)<sub>2</sub>, 1C), 144.5-144.1 (C<sub>Ar</sub>), 128.3-126.1 (C<sub>Ar</sub>), 46.8, 44.1, 41.8, 39.5 ((CD<sub>3</sub>)<sub>2</sub>SO), 37.4, 36.3, 36.3, 36.1, 26.6, 25.4, 23.8 (46.8-23.8 signifies aliphatic region). FT-IR (cm<sup>-1</sup>): 3428 (N-H str. of 1° amine), 3035 (N-H str. of 1° amine), 1677 (C=O str. of 3° amide). Formula: C<sub>21</sub>H<sub>29</sub>N<sub>3</sub>O, HRMS (m/z): 340.2379 [(M+H)<sup>+</sup>] (Observed), 340.2389 [(M+H)<sup>+</sup>] (Calculated).

**N-(Adamantan-2-yl)-2-[N',N'-{bis(3-amino) propyl} amino] ethanamide tris(trifluoroacetate) (NAda):** Yield- Quantitative, HPLC Purity- 96%. <sup>1</sup>H-NMR (400 MHz, DMSO-d<sub>6</sub>) δ/ppm: 8.391 (br, AdNHCOCH<sub>2</sub>-NH<sup>+</sup>-(CH<sub>2</sub>)<sub>3</sub>-NH<sub>3</sub><sup>+</sup>)<sub>2</sub>, 1H), 7.937 (br, AdNHCOCH<sub>2</sub>-NH<sup>+</sup>-(CH<sub>2</sub>)<sub>3</sub>-NH<sub>3</sub><sup>+</sup>)<sub>2</sub>, 6H), 3.922-3.905 (br, H<sub>Ad</sub>, 1H), 2.990-2.860 (br, AdNHCOCH<sub>2</sub>-NH<sup>+</sup>-(CH<sub>2</sub>)<sub>2</sub>-CH<sub>2</sub>-NH<sub>3</sub><sup>+</sup>)<sub>2</sub>, 6H), 1.959-1.704 (m, H<sub>Ad</sub> and AdNHCOCH<sub>2</sub>-NH<sup>+</sup>-(CH<sub>2</sub>-(CH<sub>2</sub>)<sub>2</sub>-NH<sub>3</sub><sup>+</sup>)<sub>2</sub>, 18H), 1.545-1.235 (m, AdNHCOCH<sub>2</sub>-NH<sup>+</sup>-(CH<sub>2</sub>-CH<sub>2</sub>-CH<sub>2</sub>-NH<sub>3</sub><sup>+</sup>)<sub>2</sub>, 18H).

NH<sub>3</sub><sup>+</sup>)<sub>2</sub>, 4H). <sup>13</sup>C-NMR (100 MHz, DMSO-d<sub>6</sub>): 158.6, 53.4 (AdNHCOCH<sub>2</sub>-NH<sup>+</sup>(-CH<sub>2</sub>-(CH<sub>2</sub>)<sub>2</sub>-NH<sub>3</sub><sup>+</sup>)<sub>2</sub>, 1C), , 53.1 (AdNHCOCH<sub>2</sub>-NH<sup>+</sup>(-CH<sub>2</sub>-(CH<sub>2</sub>)<sub>2</sub>-NH<sub>3</sub><sup>+</sup>)<sub>2</sub>, 2C), 51.4, 44.0, 39.5 ((CD<sub>3</sub>)<sub>2</sub>SO), 37.0, 36.7, 36.2, 31.3, 30.9, 26.6, 26.6, 23.9, 23.8 (51.4-23.8 signifies aliphatic region). FT-IR (cm<sup>-1</sup>): 3410 (N-H str. of primary amine), 3051 (N-H str. of 1° amine), 2916 (sp<sup>3</sup> C-H str.), 2852 (sp<sup>3</sup> C-H str.), 1678 (C=O str. of 2° amide). Formula: C<sub>18</sub>H<sub>34</sub>N<sub>4</sub>O, HRMS (m/z): 323.2791 [(M+H)<sup>+</sup>] (Observed), 323.2811 [(M+H)<sup>+</sup>] (Calculated).

## Spectra of final compounds

### *N,N*-bis((3-amino)propyl)decanamide bis(trifluoroacetate) (NC10)

#### <sup>1</sup>H-NMR

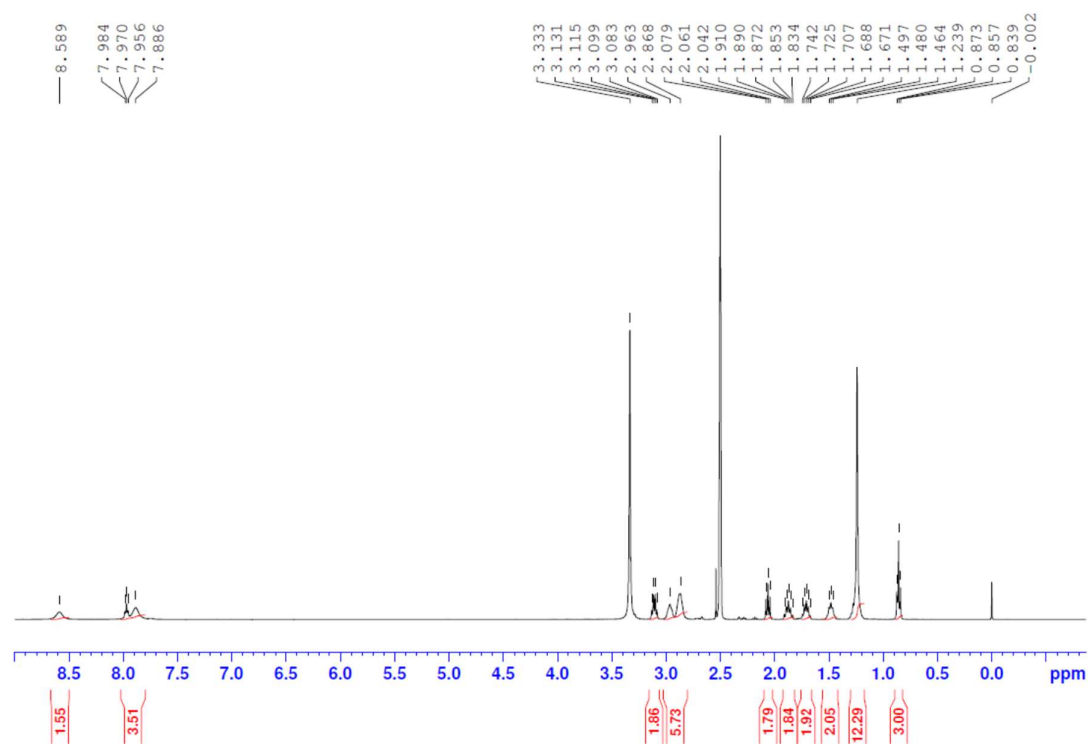

## $^{13}\text{C}$ -NMR

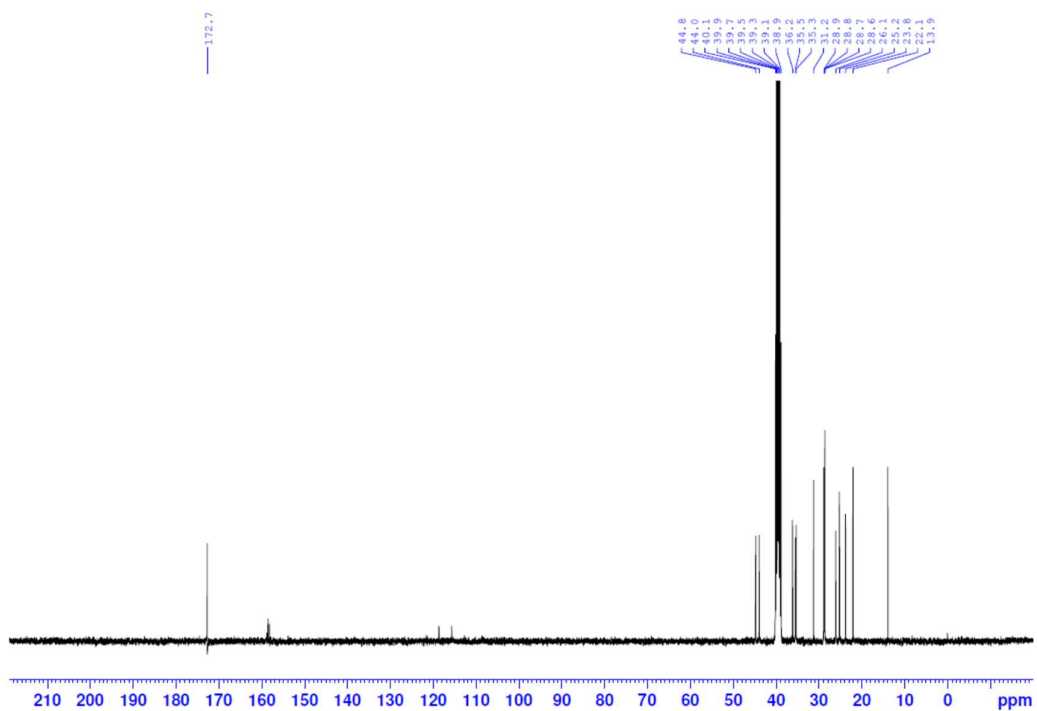

## HRMS

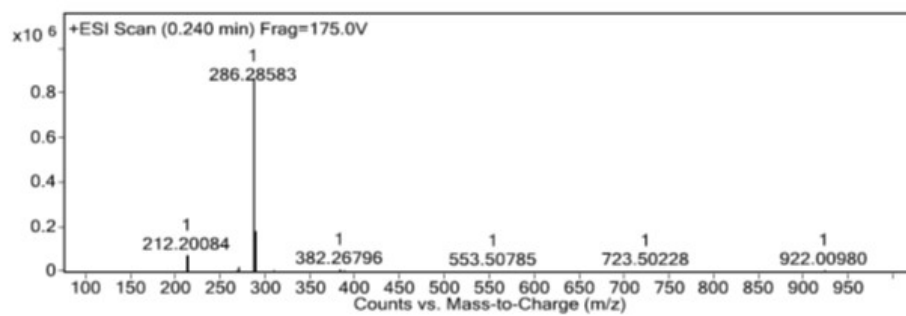

***N,N*-bis((3-amino)propyl)dodecanamide bis(trifluoroacetate) (NC12)**

**<sup>1</sup>H-NMR**

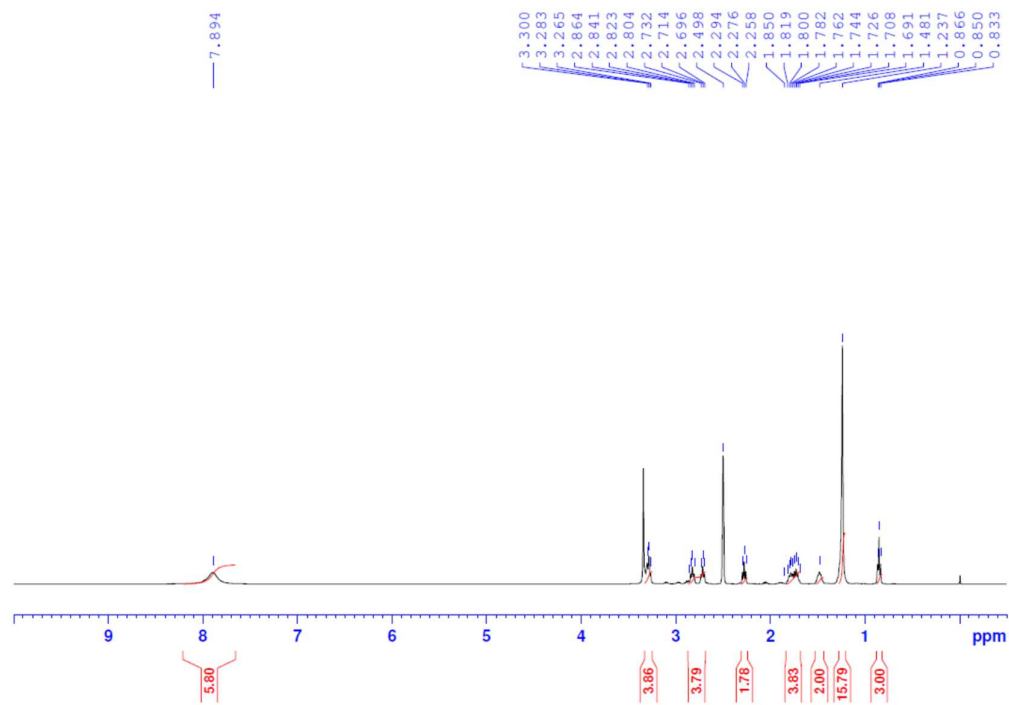

## $^{13}\text{C}$ -NMR

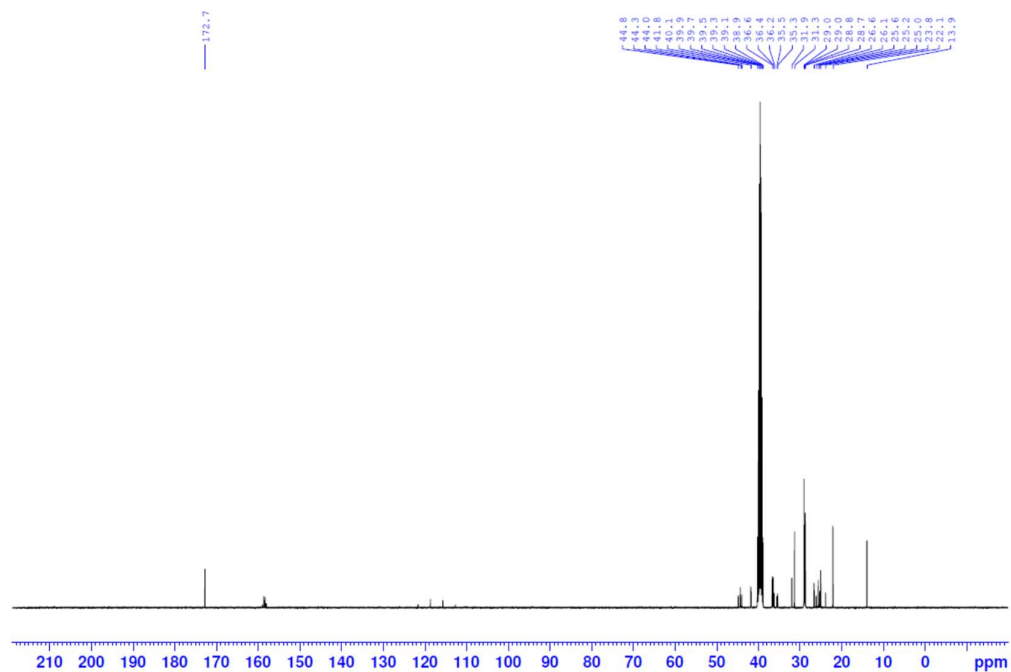

## HRMS

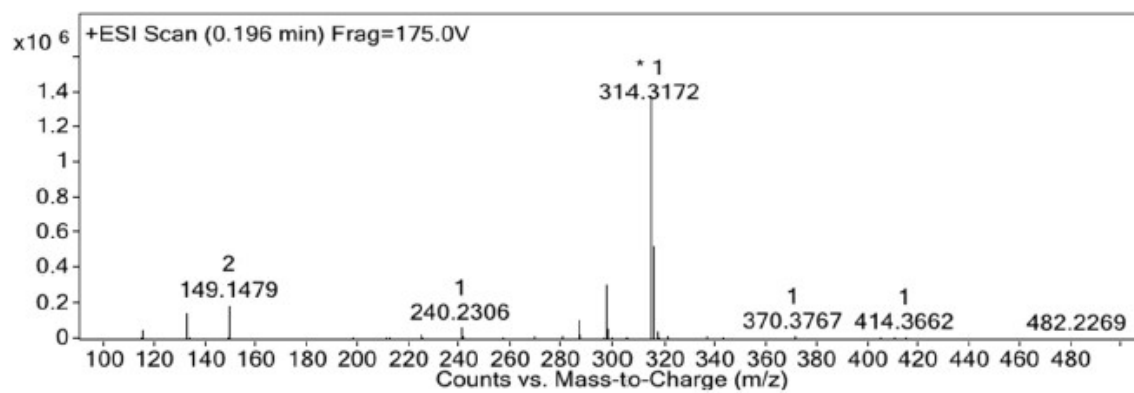



***N,N*-bis((3-amino)propyl)naphthyl ethanamide bis(trifluoroacetate) (NNaph)**

**<sup>1</sup>H-NMR**

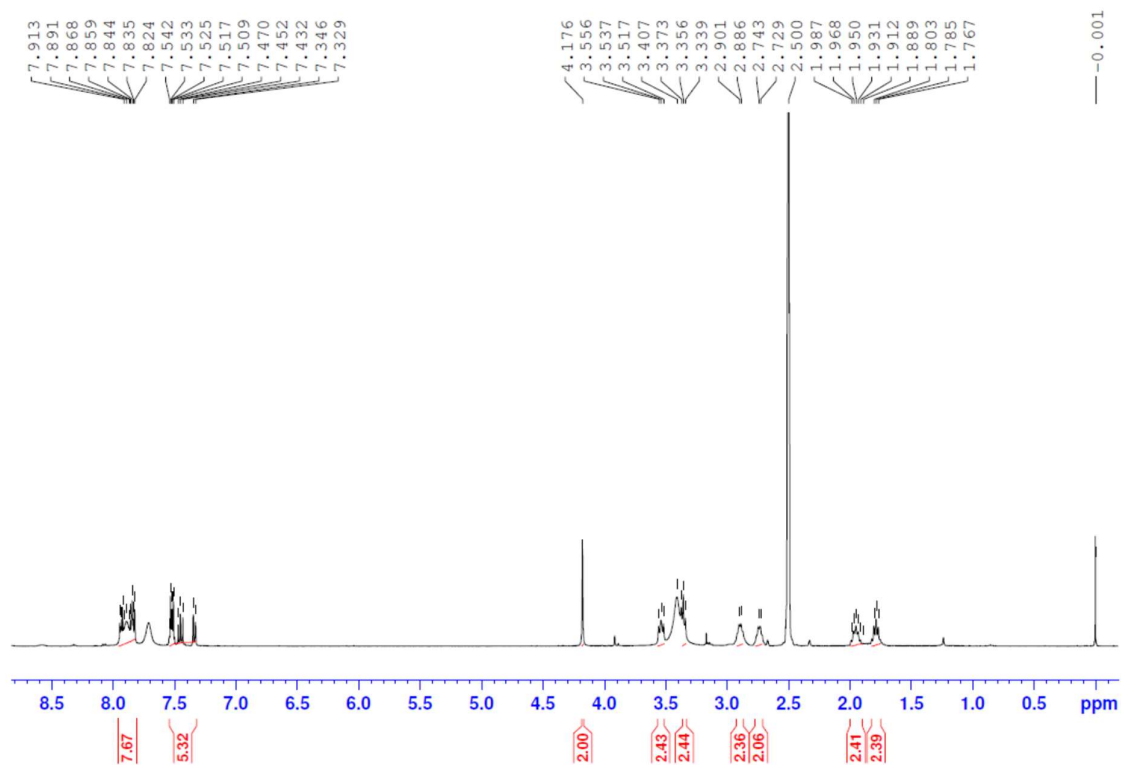

<sup>13</sup>C-NMR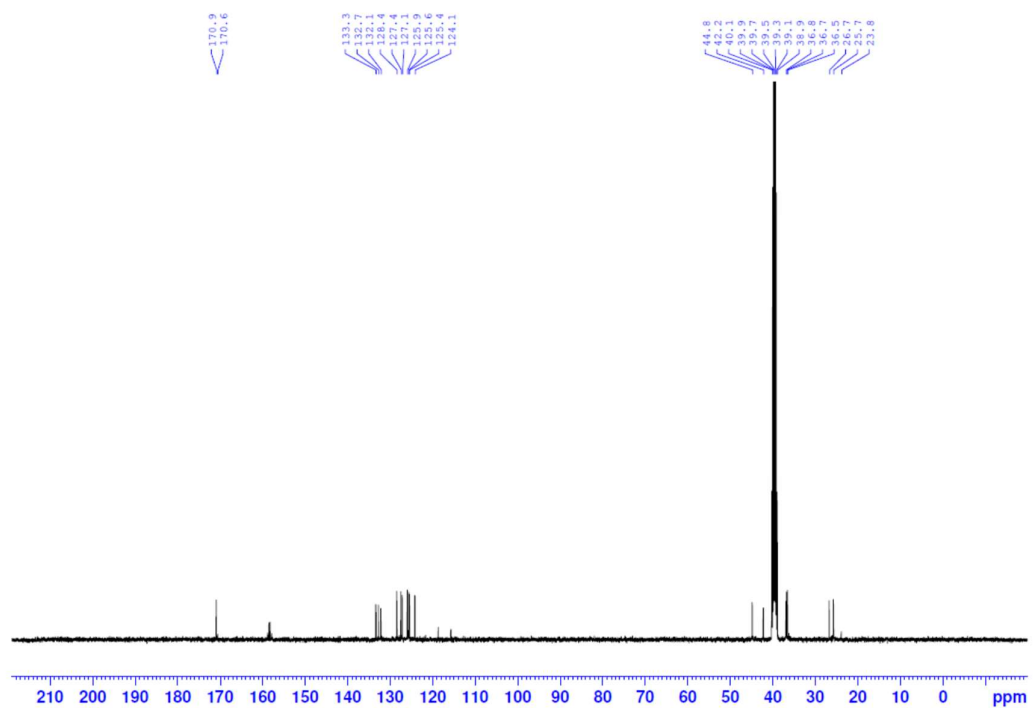

**HRMS**

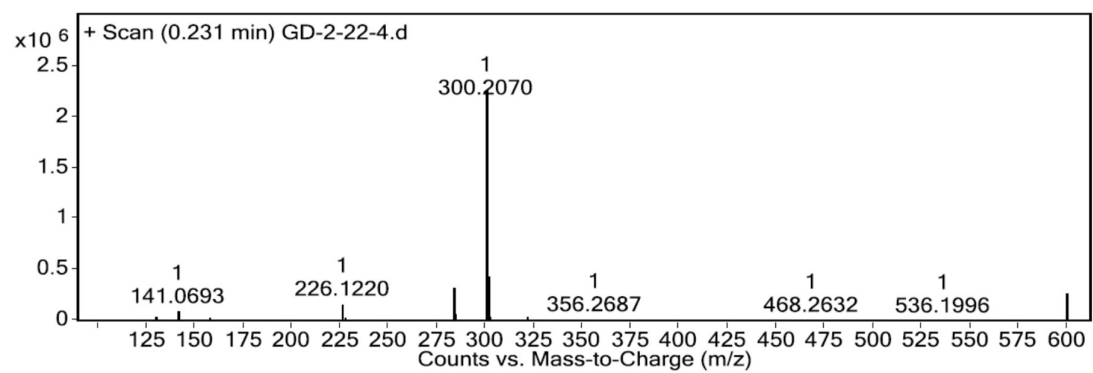

***N,N*-bis((3-amino)propyl)3,3-diphenyl propanamide bis(trifluoroacetate) (NDiphe)**

**<sup>1</sup>H-NMR**

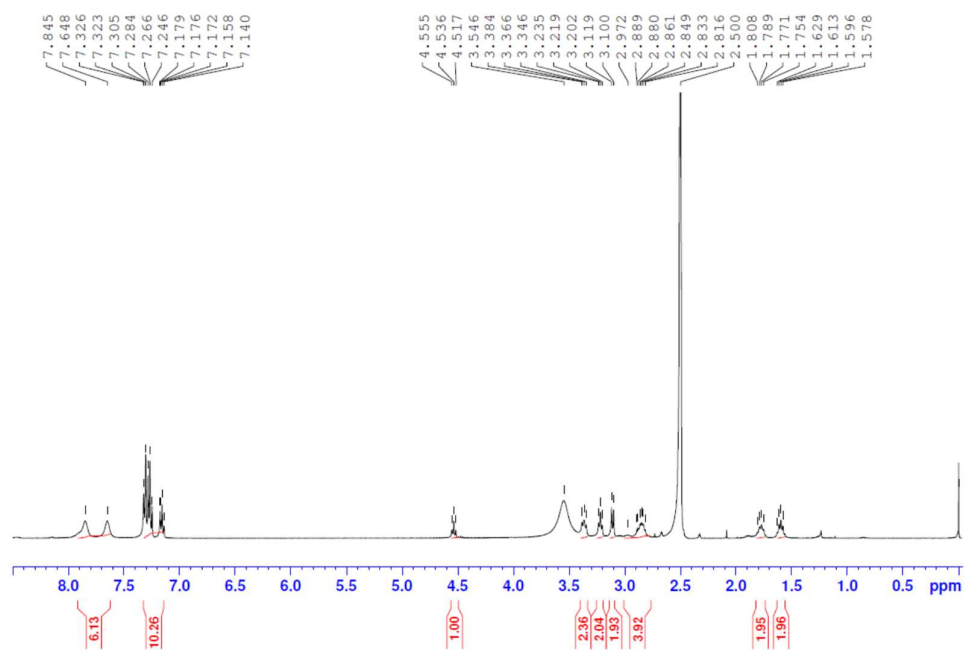

**<sup>13</sup>C-NMR**

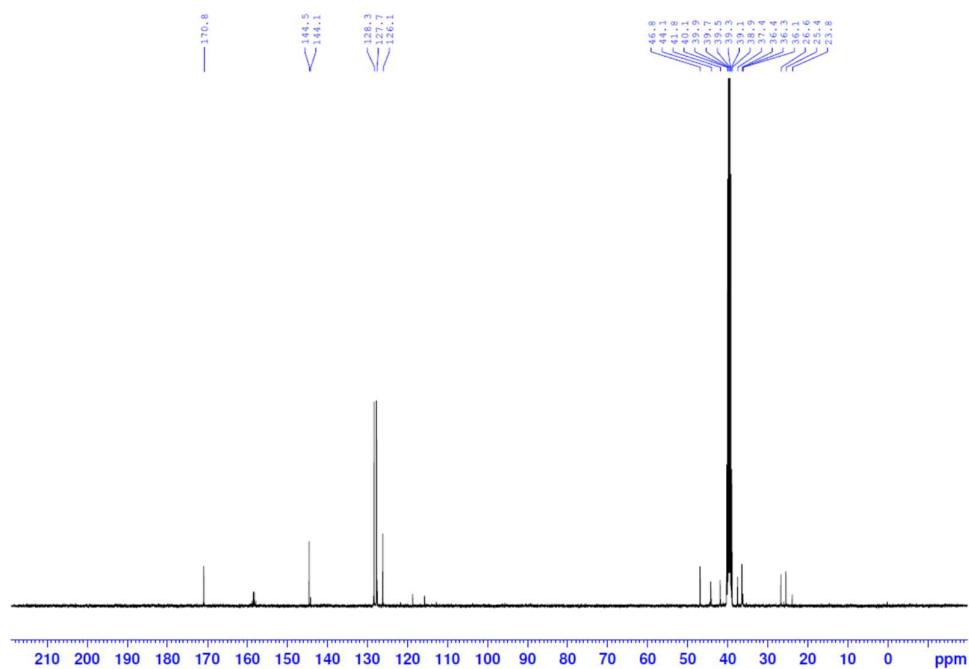

## HRMS

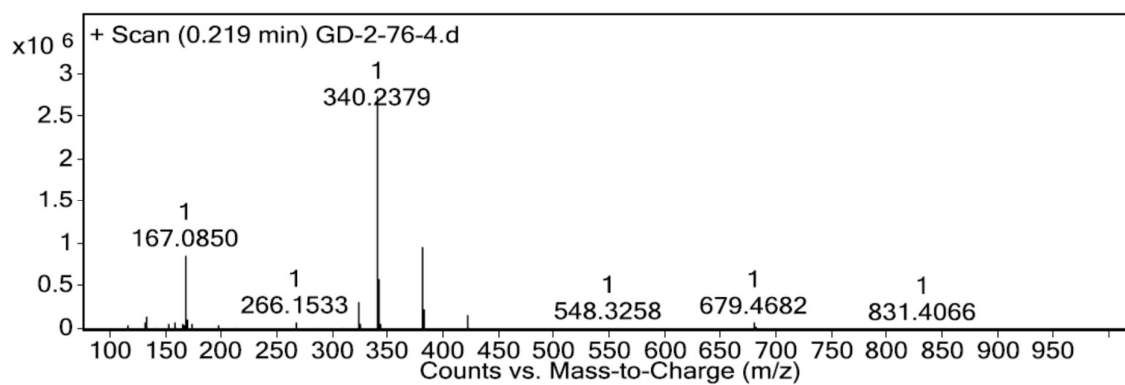

*N*-(Adamantan-2-yl)-2-[*N*',*N*'-{bis-(3-amino) propyl} amino] ethanamide tris(trifluoroacetate) (NAda)

## <sup>1</sup>H-NMR

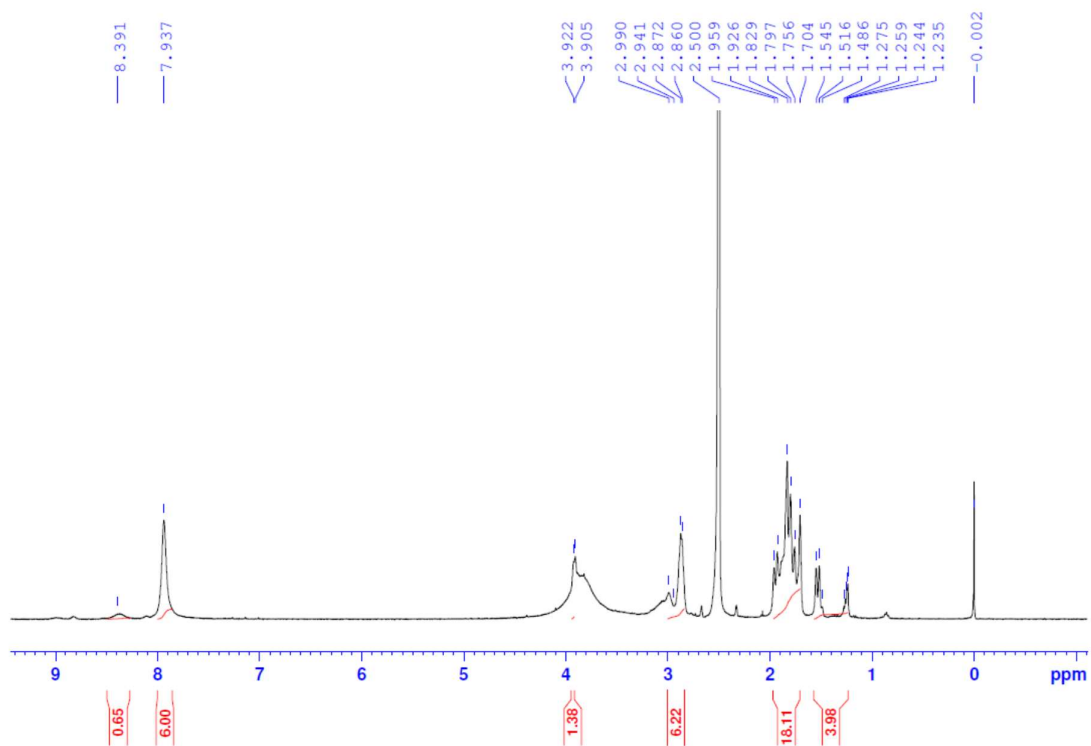

# <sup>13</sup>C-NMR

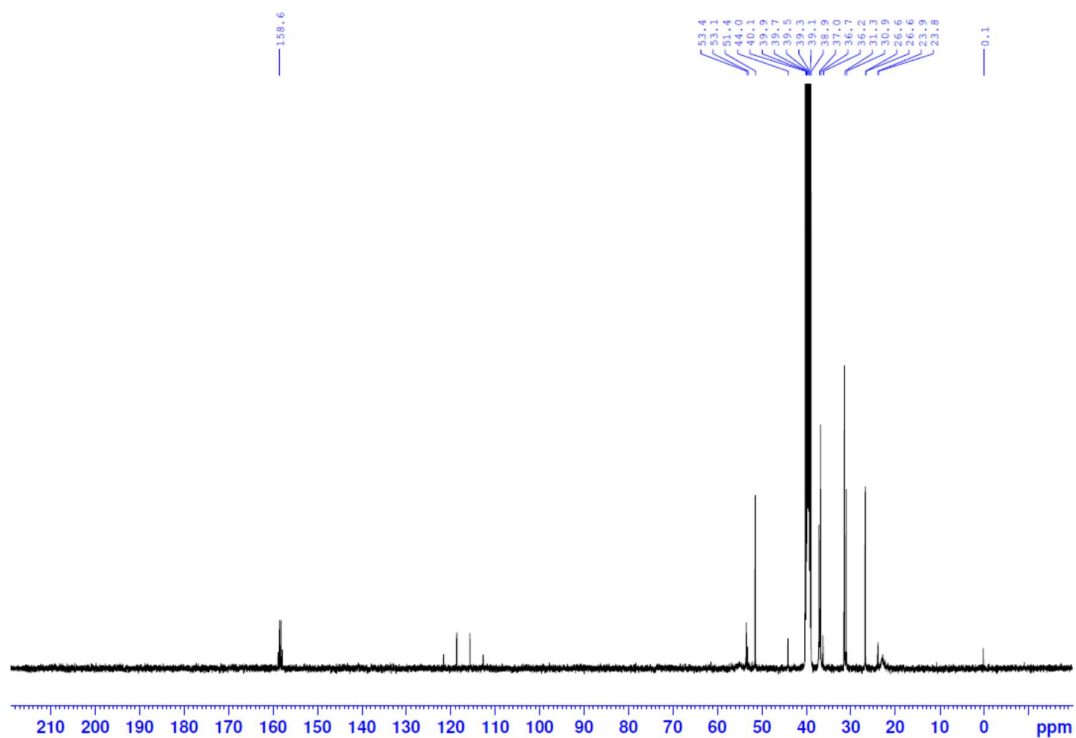

## HRMS

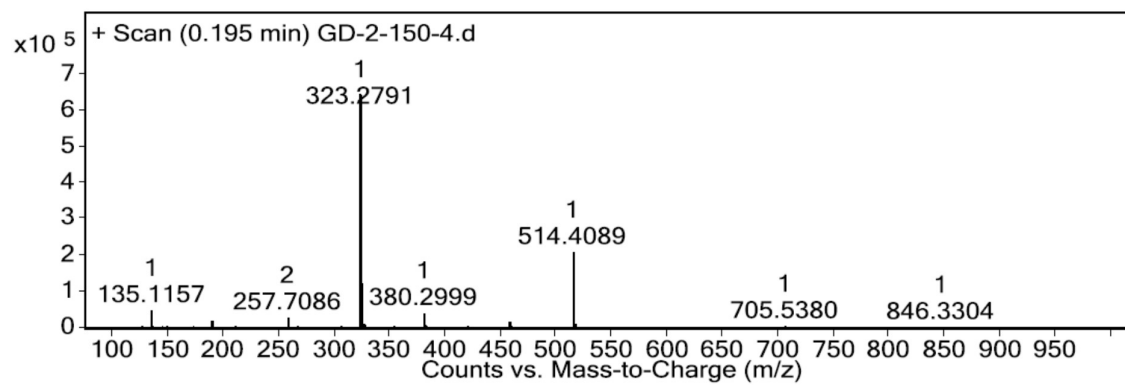

## ***In vitro* Antibacterial Assays**

### **a) Antibacterial activity in broth culture media**

Water-soluble small molecular adjuvants or antibiotics were assayed in a modified micro-dilution broth format. Stock solutions of all the adjuvants and antibiotics (10 mg/mL) were prepared in autoclaved Millipore water except for rifampicin and erythromycin whose stock solutions were made in dimethyl sulphoxide (DMSO). The dilutions of the adjuvants or antibiotics were done in a 96-well plate using autoclaved water. Bacteria, to be tested, were cultured for 6 h in nutrient broth media.  $\sim 10^8$  CFU/mL bacteria were diluted to  $\sim 10^5$  CFU/mL using Mueller Hinton Broth media to perform the experiments. 150  $\mu$ L of these diluted bacterial solutions were added to 50  $\mu$ L of serially diluted adjuvants/antibiotics present in a 96 well plate (Polystyrene). 150  $\mu$ L of media and 50  $\mu$ L of adjuvant/antibiotic served as the media control with adjuvant/antibiotic, and 150  $\mu$ L of bacterial solution and 50  $\mu$ L of water served as the bacterial control. The plate was then incubated at 37 °C in an incubator (without shaking) for a period of 18-24 h and the O.D. value was measured at 600 nm using the microplate Reader. MIC value was determined by observing the minimum concentration at which the O.D. was similar to media control. The MIC values were reported as averages of three independent experiments.

### **Assay for *in-vitro* mammalian cell toxicity**

#### **a) Hemolytic assay**

Human red blood cells (hRBCs) were isolated from fresh human blood obtained from a healthy human donor and resuspended in 1X PBS (pH 7.4) to 5% v/v. In a 96-well plate, 150  $\mu$ L of hRBC suspension was added to 50  $\mu$ L of serially diluted compound. PBS buffer added to 150  $\mu$ L of erythrocyte suspension was taken as negative hemolysis control and Triton X-100 (1% v/v), added to the suspension was used as positive hemolysis control. Incubation was done for 1 h at 37 °C. The plate was then centrifuged at 3500 rpm for 5 min. 100  $\mu$ L of the supernatant from each well was transferred to a new 96-well plate and absorbance was measured at 540 nm using a microplate Reader. Percentage of hemolysis was determined using this formula:  $(A - A_0) / (A_{\text{total}} - A_0) \times 100$ , where A is the absorbance of the test well,  $A_0$  is the absorbance of the negative controls, and  $A_{\text{total}}$  the absorbance of wells containing Triton X-100.  $HC_{50}$  (concentration which causes 50% hemolysis relative to the positive control) was determined by plotting hemolysis versus compound concentration. The  $HC_{50}$  values are reported as averages of three technical triplicates. The  $HC_{50}$  values for compounds where no hemolysis

was observed were reported as greater than the maximum concentration used. All the experiments were performed following the guidelines approved by institutional biosafety committee at JNCASR (Project no: JNC/IBSC/2020/JH-12).

**b) Lactic acid Dehydrogenase (LDH) assay**

$10^4$  cells/well of HEK cells (maintained in complete DMEM media (from Gibco) supplemented with 10% FBS and Penicillin-Streptomycin solution) were seeded in 96 well plates. Cell adherence was allowed to happen overnight. Media and 0.5% Triton-X were used as untreated and positive controls, respectively. The cells were treated with test compound solutions, starting from a concentration of 512  $\mu\text{g/mL}$ . After 24 h of compound treatment, the plates were centrifuged at 1200 rpm for 5 min. 100  $\mu\text{L}$  of the supernatant was then transferred to a fresh 96-well plate and absorbance at 490 nm was measured using a microplate Reader. Percentage of cell death was determined using this formula:  $(A - A_0) / (A_{\text{total}} - A_0) \times 100$ , where A is the absorbance of the test well,  $A_0$  is the absorbance of the negative controls,  $A_{\text{total}}$  absorbance of wells treated with triton-X. Percentage of LDH release was plotted versus adjuvant concentration and  $\text{EC}_{50}$  was determined (concentration which causes 50% LDH release as compared to the positive control).

**c) MTT assay**

The cells were incubated with MTT for 4 h. After solubilizing the purple crystals formed, the absorbance was measured at 590 nm with a Tecan InfinitePro series M200 Micro plate Reader. Percentage of viable cells was determined as  $(A - A_0) / (A_{\text{total}} - A_0) \times 100$ , where A is the absorbance of the test well,  $A_0$  is the absorbance of the well containing negative control treated with Triton-X (where no cells are present),  $A_{\text{total}}$  is the absorbance of the positive control (without any compound treatment). Percentage toxicity was plotted (after subtracting the % cell viability obtained from the assay from 100) as a function of concentration and  $\text{EC}_{50}$  determined where the cell viability was equal to 50% of the untreated positive control.

## Results

Table S1. Concentration of adjuvants required to reduce the MIC of antibiotics as per Figure 1D.

| Compound      | Concentration required to reduce the MIC of antibiotics as per Figure 1D (µg/mL) |              |            |
|---------------|----------------------------------------------------------------------------------|--------------|------------|
|               | Minocycline                                                                      | Fusidic acid | Rifampicin |
| <b>NC12</b>   | 128                                                                              | 64           | 16         |
| <b>NC10</b>   | 32                                                                               | 64           | 64         |
| <b>NAda</b>   | 128                                                                              | 128          | 128        |
| <b>NDiphe</b> | 16                                                                               | 128          | 128        |
| <b>NNaph</b>  | 64                                                                               | 128          | 128        |

Table S2. Activity of **NAda** and **NDiphe** against New-Delhi metallo beta-lactamase producing clinical isolates.

| Compound      | MIC (µg/mL)          |                            |
|---------------|----------------------|----------------------------|
|               | <i>E. coli</i> R3336 | <i>K. pneumoniae</i> R3934 |
| <b>NDiphe</b> | >512                 | >512                       |
| <b>NAda</b>   | >512                 | >512                       |



Table S3. Potentiation efficacy of NAda with various other antibiotics.

| Antibiotic      | Bacteria                   | MIC of antibiotic in absence of adjuvant (µg/mL) | MIC of antibiotic in presence of NAda (µg/mL) |            |            |
|-----------------|----------------------------|--------------------------------------------------|-----------------------------------------------|------------|------------|
|                 |                            |                                                  | + 32 µg/mL                                    | + 64 µg/mL | +128 µg/mL |
| Tetracycline    | <i>A. baumannii</i> R674   | 128                                              | 16                                            | 16         | 16         |
|                 | <i>P. aeruginosa</i> R590  | 128-256                                          | 16                                            | 16         | 8          |
|                 | <i>K. pneumoniae</i> R3934 | >512                                             | 4                                             | 4          | 2          |
|                 | <i>E. coli</i> R3336       | 16                                               | 2                                             | 2          | 2          |
| Doxycycline     | <i>A. baumannii</i> R674   | 64                                               | 1                                             | 0.125      | 0.125      |
|                 | <i>P. aeruginosa</i> R590  | 64                                               | 8                                             | 8          | 8          |
|                 | <i>K. pneumoniae</i> R3934 | 128                                              | 32                                            | 16         | 16         |
|                 | <i>E. coli</i> R3336       | 64                                               | 1                                             | 1          | 0.5        |
| Erythromycin    | <i>A. baumannii</i> R674   | 512                                              | 16                                            | 16         | 16         |
|                 | <i>P. aeruginosa</i> R590  | 512                                              | 32                                            | 16         | 16         |
|                 | <i>K. pneumoniae</i> R3934 | >512                                             | 32                                            | 16         | 16         |
|                 | <i>E. coli</i> R3336       | >512                                             | >64                                           | >64        | >64        |
| Vancomycin      | <i>A. baumannii</i> R674   | 64                                               | 32                                            | 8          | 1          |
|                 | <i>P. aeruginosa</i> R590  | 64                                               | 64                                            | 32         | 16         |
|                 | <i>K. pneumoniae</i> R3934 | >512                                             | >64                                           | >64        | >64        |
|                 | <i>E. coli</i> R3336       | 512                                              | >64                                           | >64        | >64        |
| Chloramphenicol | <i>A. baumannii</i> R674   | 128                                              | 64                                            | 64         | 32         |
|                 | <i>P. aeruginosa</i> R590  | 256                                              | 64                                            | 64         | 32         |
|                 | <i>K. pneumoniae</i> R3934 | 256                                              | 8                                             | 8          | 4          |
|                 | <i>E. coli</i> R3336       | >512                                             | >64                                           | >64        | >64        |

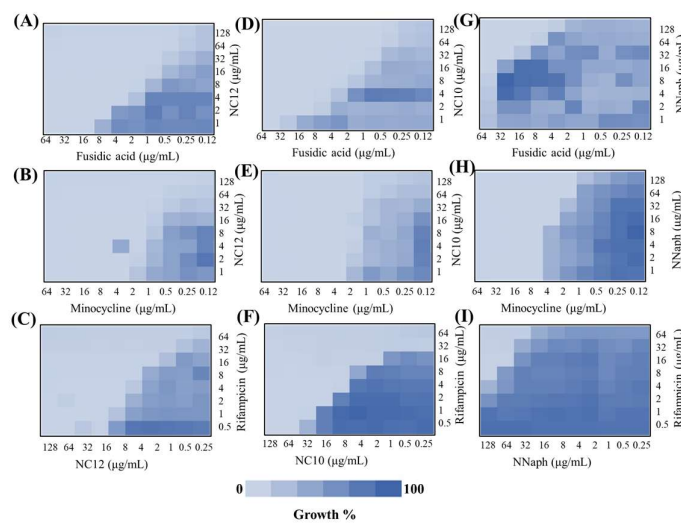

Figure S1. (A)-(C) Chequerboard assays of **NC12** with fusidic acid, minocycline and rifampicin respectively against *A. baumannii* R674. (D)-(F) Chequerboard assays of **NC10** with fusidic acid, minocycline and rifampicin respectively against *A. baumannii* R674. (G)-(I) Chequerboard assays of **NNaph** with fusidic acid, minocycline and rifampicin respectively against *A. baumannii* R674.

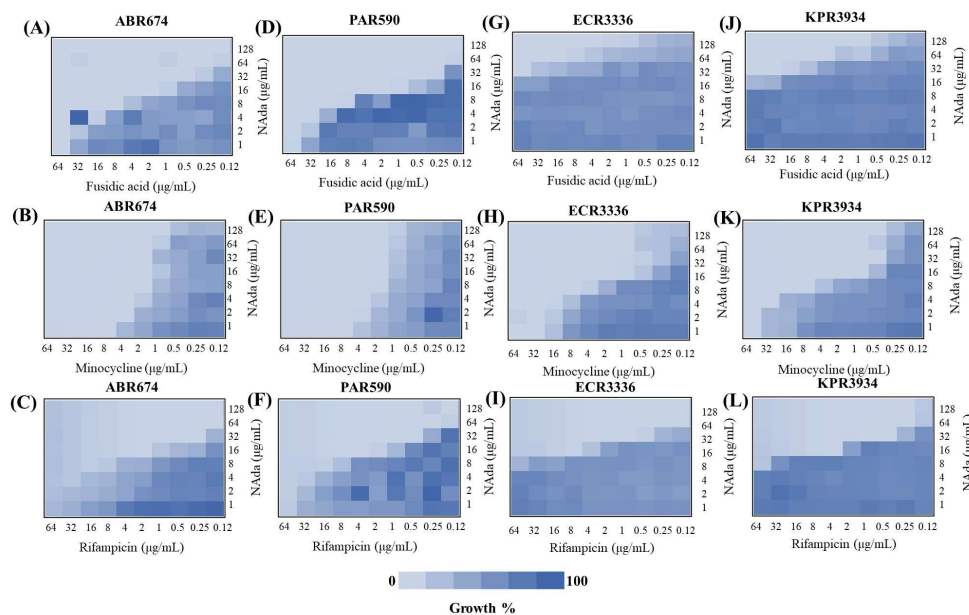

Figure S2. Chequerboard assays of **NAda** with fusidic acid, minocycline and rifampicin respectively against (A)-(C) *A. baumannii* R674, (D)-(F) *P. aeruginosa* R590, (G)-(I) *E. coli* R3336, (J)-(L) *K. pneumoniae* R3934.

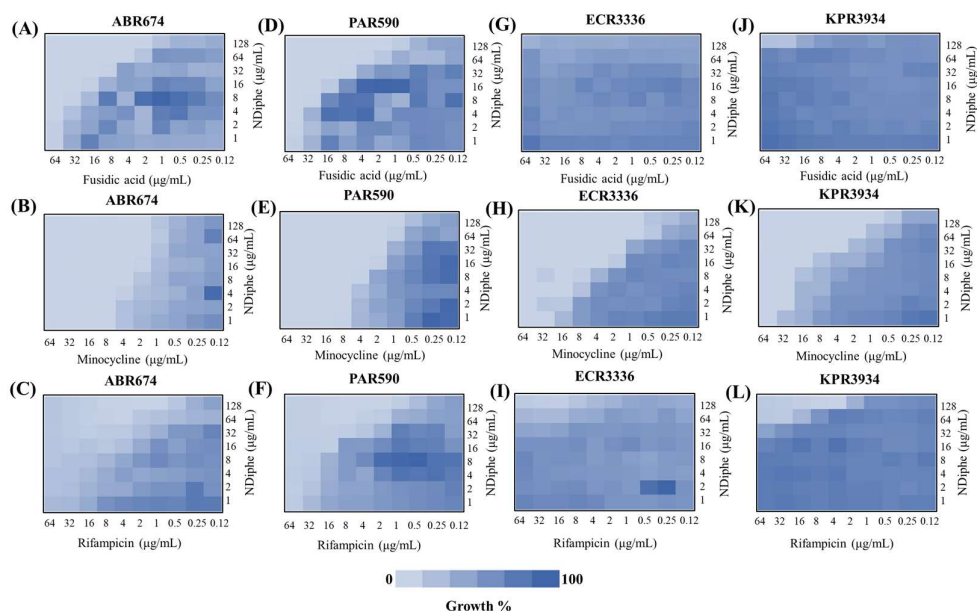

Figure S3. Chequerboard assays of **NDiphe** with fusidic acid, minocycline and rifampicin respectively against (A)-(C) *A. baumannii* R674, (D)-(F) *P. aeruginosa* R590, (G)-(I) *E. coli* R3336, (J)-(L) *K. pneumoniae* R3934.

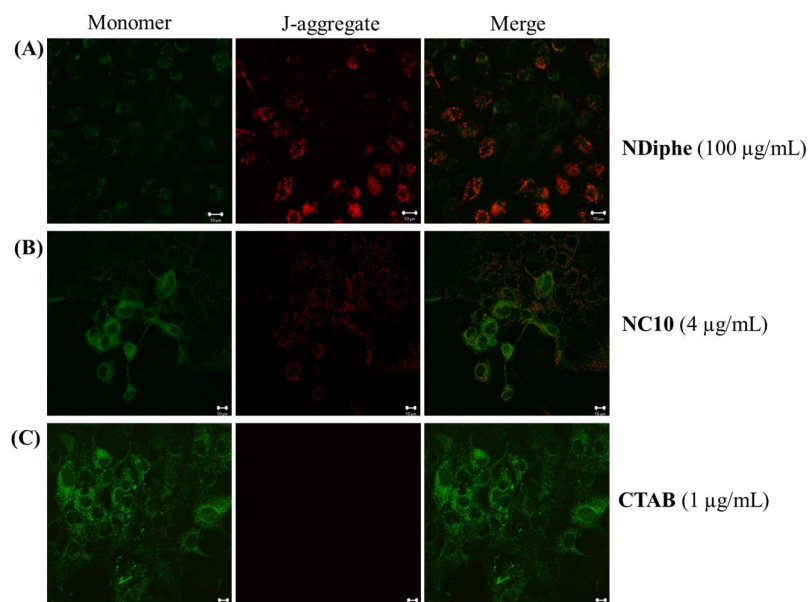

Figure S4. Analysis of mitochondrial membrane potential of HEK 293 cells by studying the formation of J-aggregates through confocal microscopy when treated with (A) **NDiphe** (100 µg/mL). (B) **NC10** (4 µg/mL). (C) **CTAB** (1 µg/mL). Note: Scale bar is 10 µm.

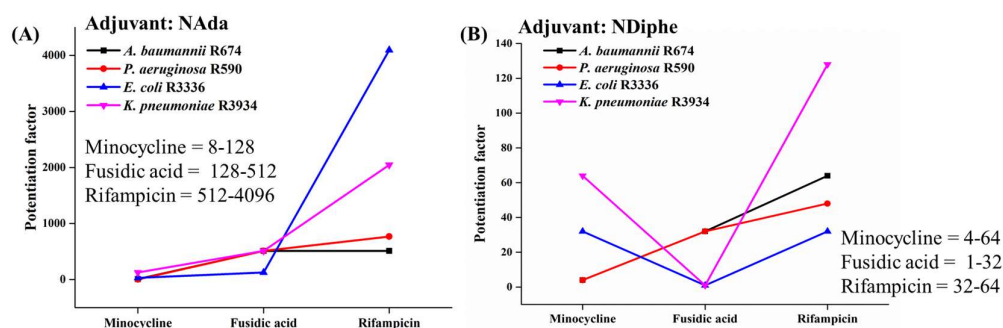

Figure S5. (A) Potentiation factors of different antibiotics in presence of 128  $\mu\text{g/mL}$  of **NAda**. (B) Potentiation factors of different antibiotics in presence of **NDiphe**. Potentiation factor =  $\text{MIC}_{\text{antibiotic alone}} / \text{MIC}_{\text{antibiotic in presence of adjuvant}}$ .

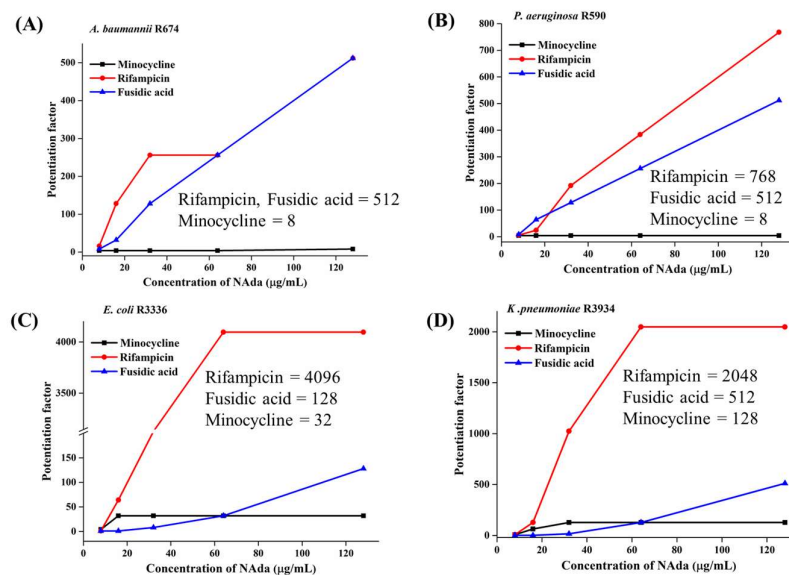

Figure S6. Trend of potentiation of antibiotics with concentration of **NAda** against (A) *A. baumannii* R674. (B) *P. aeruginosa* R590. (C) *E. coli* R3336. (D) *K. pneumoniae* R3934.

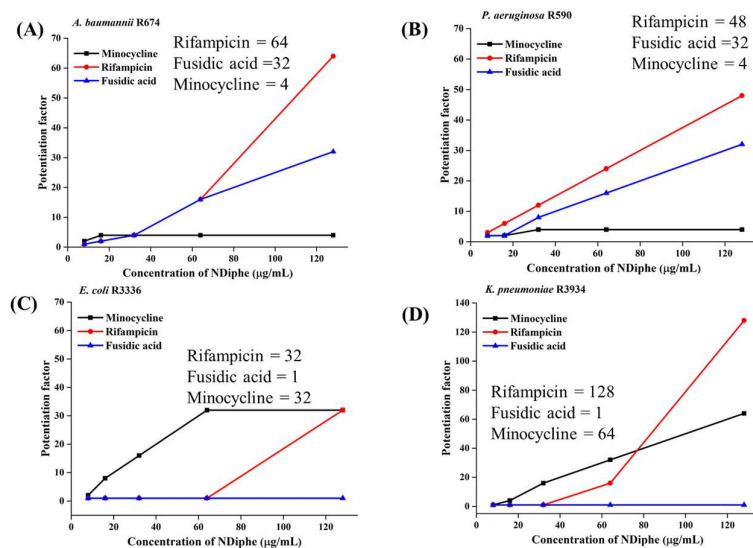

Figure S7. Trend of potentiation of antibiotics with concentration of **NDiphe** against (A) *A. baumannii* R674. (B) *P. aeruginosa* R590. (C) *E. coli* R3336. (D) *K. pneumoniae* R3934. For MIC > 64 μg/mL; potentiation factor is taken to be 1.

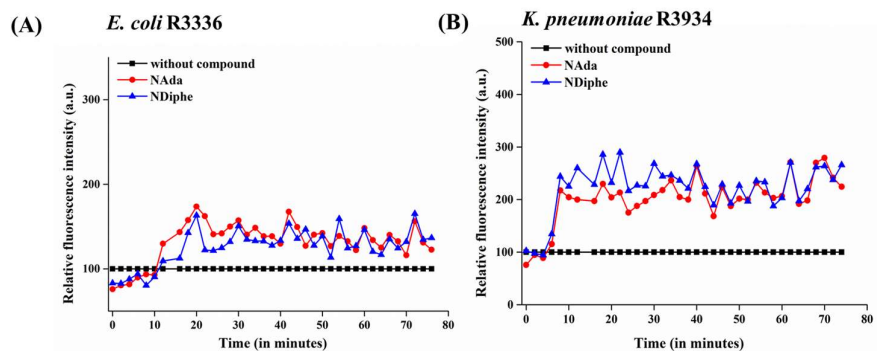

Figure S8. Temporal accumulation of minocycline in presence of **NAda** (100 μg/mL) and **NDiphe** (100 μg/mL) in (A) *E. coli* R3336 and (B) *K. pneumoniae* R3934.

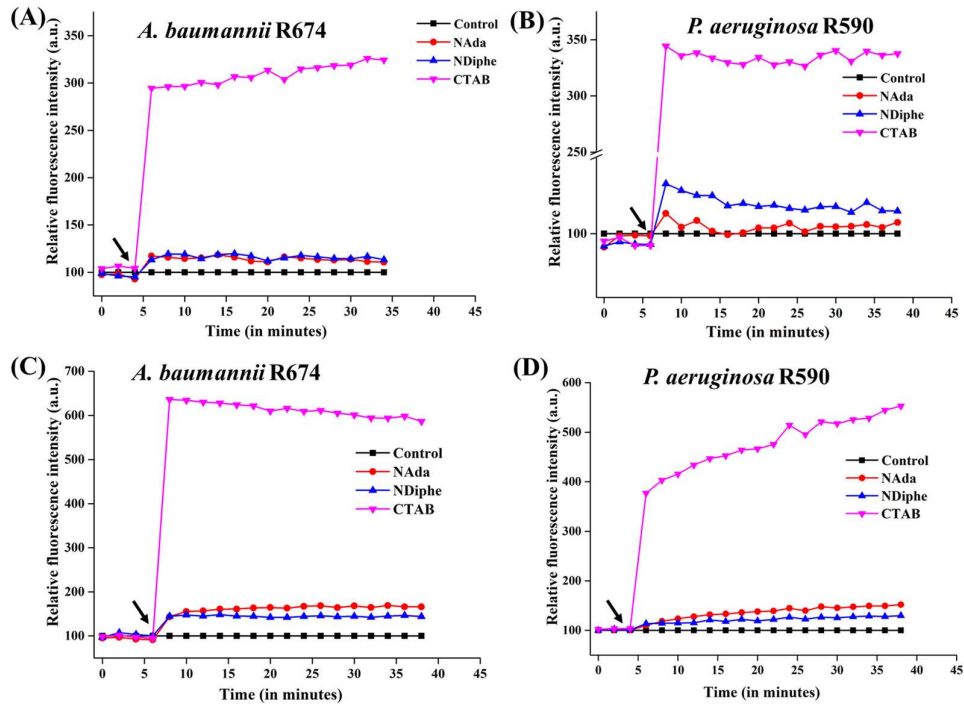

Figure S9. (A) Outer membrane permeabilization in *A. baumannii* R674; and (B) Outer membrane permeabilization in *P. aeruginosa* R590; in presence of **NAda** (100  $\mu\text{g/mL}$ ), **NDiphe** (100  $\mu\text{g/mL}$ ) (C) Membrane depolarization in *A. baumannii* R674; (D) Membrane depolarization in *P. aeruginosa* R590; in presence of **NAda** (100  $\mu\text{g/mL}$ ) and **NDiphe** (100  $\mu\text{g/mL}$ ). CTAB was used as control. Arrow indicates the time of compound addition.

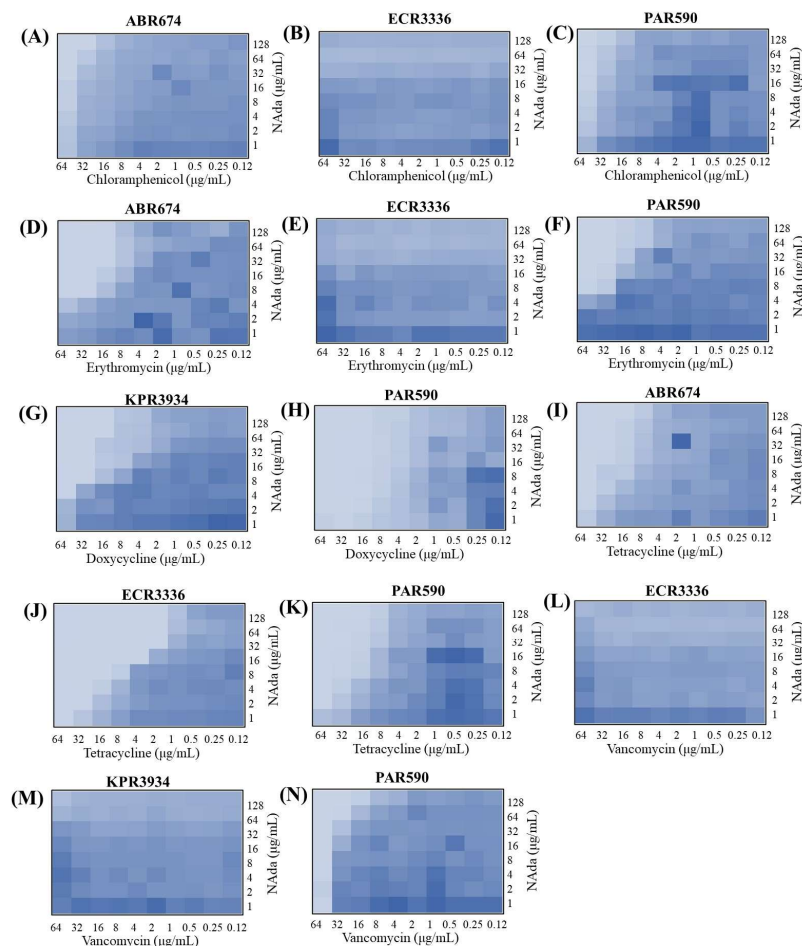

Figure S10. Chequerboard assays of **NAda** with chloramphenicol against (A) *A. baumannii* R674; (B) *E. coli* R3336; (C) *P. aeruginosa* R590; Chequerboard assays of **NAda** with erythromycin against (D) *A. baumannii* R674; (E) *E. coli* R3336; (F) *P. aeruginosa* R590; Chequerboard assays of **NAda** with doxycycline against (G) *K. pneumoniae* R3934; (H) *P. aeruginosa* R590; Chequerboard assays of **NAda** with tetracycline against (I) *A. baumannii* R674; (J) *E. coli* R3336; (K) *P. aeruginosa* R590; Chequerboard assays of **NAda** with vancomycin against (L) *E. coli* R3336; (M) *K. pneumoniae* R3934; (N) *P. aeruginosa* R590.
